# Supplementary material for: GrgA as a potential target of selective antichlamydials
Source: PubMed Central journal article supplement (PMC6396966; doi:10.1371/journal.pone.0212874), 2019-03-01
Supplement: pone.0212874.s001.pdf [file pone.0212874.s001.pdf]

**S1 Table. Primers for amplifying and sequencing SNPs and resistance markers**

| Primer      | Sequence (5'-3')     |
|-------------|----------------------|
| rpoB F      | CAATCCTCTTCAACATCAGC |
| rpoB R*     | CGTTCGAGAAAGAATGAA   |
| pdf F*      | CTCCAGAATCAACACCGA   |
| pdf R       | GTGTTGGAGCATCTAGGG   |
| 16s rRNA F* | CTTGATGTGGATGGTCTC   |
| 16s rRNA R  | CTTATTACCAGCTCGCC    |
| SNP1 F      | GTTGAGCTGCAAG GAAAC  |
| SNP1 R*     | TCTTAAAGGTAATTCTGCCG |
| SNP2 F*     | CTCATCCCG GCTGAATC   |
| SNP2 R      | GATTCCATGACTCCCAGATC |
| SNP3 F*     | CCGGAGTGGATGGT AGTC  |
| SNP3 R      | ACGCTGCCATCAGACACC   |
| SNP4 F*     | GGTCTAGTCC AACAGCC   |
| SNP4 R      | CTCGGAAAGATTGGAGAG   |

Asterisks signify primers for sequencing in addition to amplification.
