# Supplementary material for: GrgA as a potential target of selective antichlamydials
Source: PubMed Central journal article supplement (PMC6396966; doi:10.1371/journal.pone.0212874), 2019-03-01
Supplement: pone.0212874.s002.pdf [file pone.0212874.s002.pdf]

**S2 Table. Possible genotypes and actual available clonal populations obtained from MoPn\_Rif<sup>R</sup> X MCR\_LBM<sup>R</sup> recombination**

| Genotype | SNP1<br>MOMP | SNP2<br>Npt1 | SNP3<br>TC0412 | SNP4<br>GrgA | Clonal population                                          |
|----------|--------------|--------------|----------------|--------------|------------------------------------------------------------|
| 1        | W            | W            | W              | W            | w1c1, w1c7, w1c15, w5c1, w5c2, w5c3                        |
| 2        | M            | W            | W              | W            | w1c6, w1c8, w1c13                                          |
| 3        | W            | M            | W              | W            | Not available                                              |
| 4        | W            | W            | M              | W            | w1c3                                                       |
| 5        | W            | W            | W              | M            | Not available                                              |
| 6        | M            | M            | W              | W            | w1c4, w1c10, w1c11                                         |
| 7        | M            | W            | M              | W            | Not available                                              |
| 8        | M            | W            | W              | M            | Not available                                              |
| 9        | W            | M            | M              | W            | w1c12, w2c2, w2c4, w2c5                                    |
| 10       | W            | M            | W              | M            | Not available                                              |
| 11       | W            | W            | M              | M            | w2c10                                                      |
| 12       | M            | M            | M              | W            | w1c2, w1c5, w1c9, w2c1, w2c3, w2c6, w3c1, w3c3, w3c4, w3c5 |
| 13       | M            | M            | W              | M            | Not available                                              |
| 14       | M            | W            | M              | M            | Not available                                              |
| 15       | W            | M            | M              | M            | Not available                                              |
| 16       | M            | M            | M              | M            | w2c7, w2c8, w3c2, w5c4                                     |
