# Supplementary material for: GrgA as a potential target of selective antichlamydials
Source: PubMed Central journal article supplement (PMC6396966; doi:10.1371/journal.pone.0212874), 2019-03-01
Supplement: pone.0212874.s003.pdf [file pone.0212874.s003.pdf]

**S3 Table. Possible genotypes and actual available clonal populations obtained from MoPn\_Spc<sup>R</sup> and MCR\_Rif<sup>R</sup> recombination**

| Genotype | SNP1<br>MOMP | SNP2<br>Npt1 | SNP3<br>TC0412 | SNP4<br>GrgA | Clonal population                                                                         |
|----------|--------------|--------------|----------------|--------------|-------------------------------------------------------------------------------------------|
| 1        | W            | W            | W              | W            | r4s1, r4s2, r4s3, r4s4, r4s5, r4s6, r4s7, r4s8, r4s9, r4s10, r5s3, r5s4, r5s5, r5s6, r5s7 |
| 2        | M            | W            | W              | W            | Not available                                                                             |
| 3        | W            | M            | W              | W            | Not available                                                                             |
| 4        | W            | W            | M              | W            | r4s11, r5s2,                                                                              |
| 5        | W            | W            | W              | M            | r8s1, r8s2, r8s4, r8s6, r8s7, r8s9, r8s10, r8s11, r8s24                                   |
| 6        | M            | M            | W              | W            | Not available                                                                             |
| 7        | M            | W            | M              | W            | Not available                                                                             |
| 8        | M            | W            | W              | M            | r5s1                                                                                      |
| 9        | W            | M            | M              | W            | Not available                                                                             |
| 10       | W            | M            | W              | M            | Not available                                                                             |
| 11       | W            | W            | M              | M            | r4s12, r4s13                                                                              |
| 12       | M            | M            | M              | W            | Not available                                                                             |
| 13       | M            | M            | W              | M            | Not available                                                                             |
| 14       | M            | W            | M              | M            | r1s4, r8s5, r8s8, r8s21, r8s22                                                            |
| 15       | W            | M            | M              | M            | Not available                                                                             |
| 16       | M            | M            | M              | M            | Not available                                                                             |
