# Supplementary material for: GrgA as a potential target of selective antichlamydials
Source: PubMed Central journal article supplement (PMC6396966; doi:10.1371/journal.pone.0212874), 2019-03-01
Supplement: pone.0212874.s004.pdf [file pone.0212874.s004.pdf]

**S4 Table. The S4(R51G GrgA) allele is both necessary and sufficient for BAH resistance**

|                         | SNP1<br>MOMP | SNP2<br>Npt1 | SNP3<br>TC0412 | SNP4<br>GrgA | Clonal population       | Phenotype   |
|-------------------------|--------------|--------------|----------------|--------------|-------------------------|-------------|
| <b>S4<br/>R51G GrgA</b> | M            | M            | M              | M            | w3c2, w5c4              | Resistant   |
|                         | M            | M            | W              | M            | Not available           |             |
|                         | M            | W            | M              | M            | r1c4, r8s5              | Resistant   |
|                         | W            | M            | M              | M            | Not available           |             |
|                         | M            | W            | W              | M            | r5s1                    | Resistant   |
|                         | W            | M            | W              | M            | Not available           |             |
|                         | W            | W            | M              | M            | w2c10, r4s12, r4s13     | Resistant   |
|                         | W            | W            | W              | M            | r8s6, r8s7, r8s11       | Resistant   |
| <b>S4<br/>wtGrgA</b>    | W            | W            | W              | W            | r4s9, r5s7, w1c15, w5c2 | Susceptible |
|                         | W            | W            | M              | W            | w1c3, r4s11, r5s2       | Susceptible |
|                         | W            | M            | W              | W            | Not available           |             |
|                         | M            | W            | W              | W            | w1c13                   | Susceptible |
|                         | W            | M            | M              | W            | w2c2, w1c12, w2c4       | Susceptible |
|                         | M            | W            | M              | W            | Not available           |             |
|                         | M            | M            | W              | W            | w1c10, w1c4             | Susceptible |
|                         | M            | M            | M              | W            | w3c4, w3c5              | Susceptible |

BAH inhibition phenotype (susceptible or resistant) of clonal populations arranged by the allele (wild-type or mutant, abbreviated as W or M, respectively) of the S4(GrgA) locus. Listed clonal populations tested for BAH susceptibility were from either MoPn\_Rif<sup>R</sup> X MCR\_LBM<sup>R</sup> recombination or MoPn\_SpcR X MCR\_Rif<sup>R</sup> recombination.
