# Supplementary material for: GrgA as a potential target of selective antichlamydials
Source: PubMed Central journal article supplement (PMC6396966; doi:10.1371/journal.pone.0212874), 2019-03-01
Supplement: pone.0212874.s005.pdf [file pone.0212874.s005.pdf]

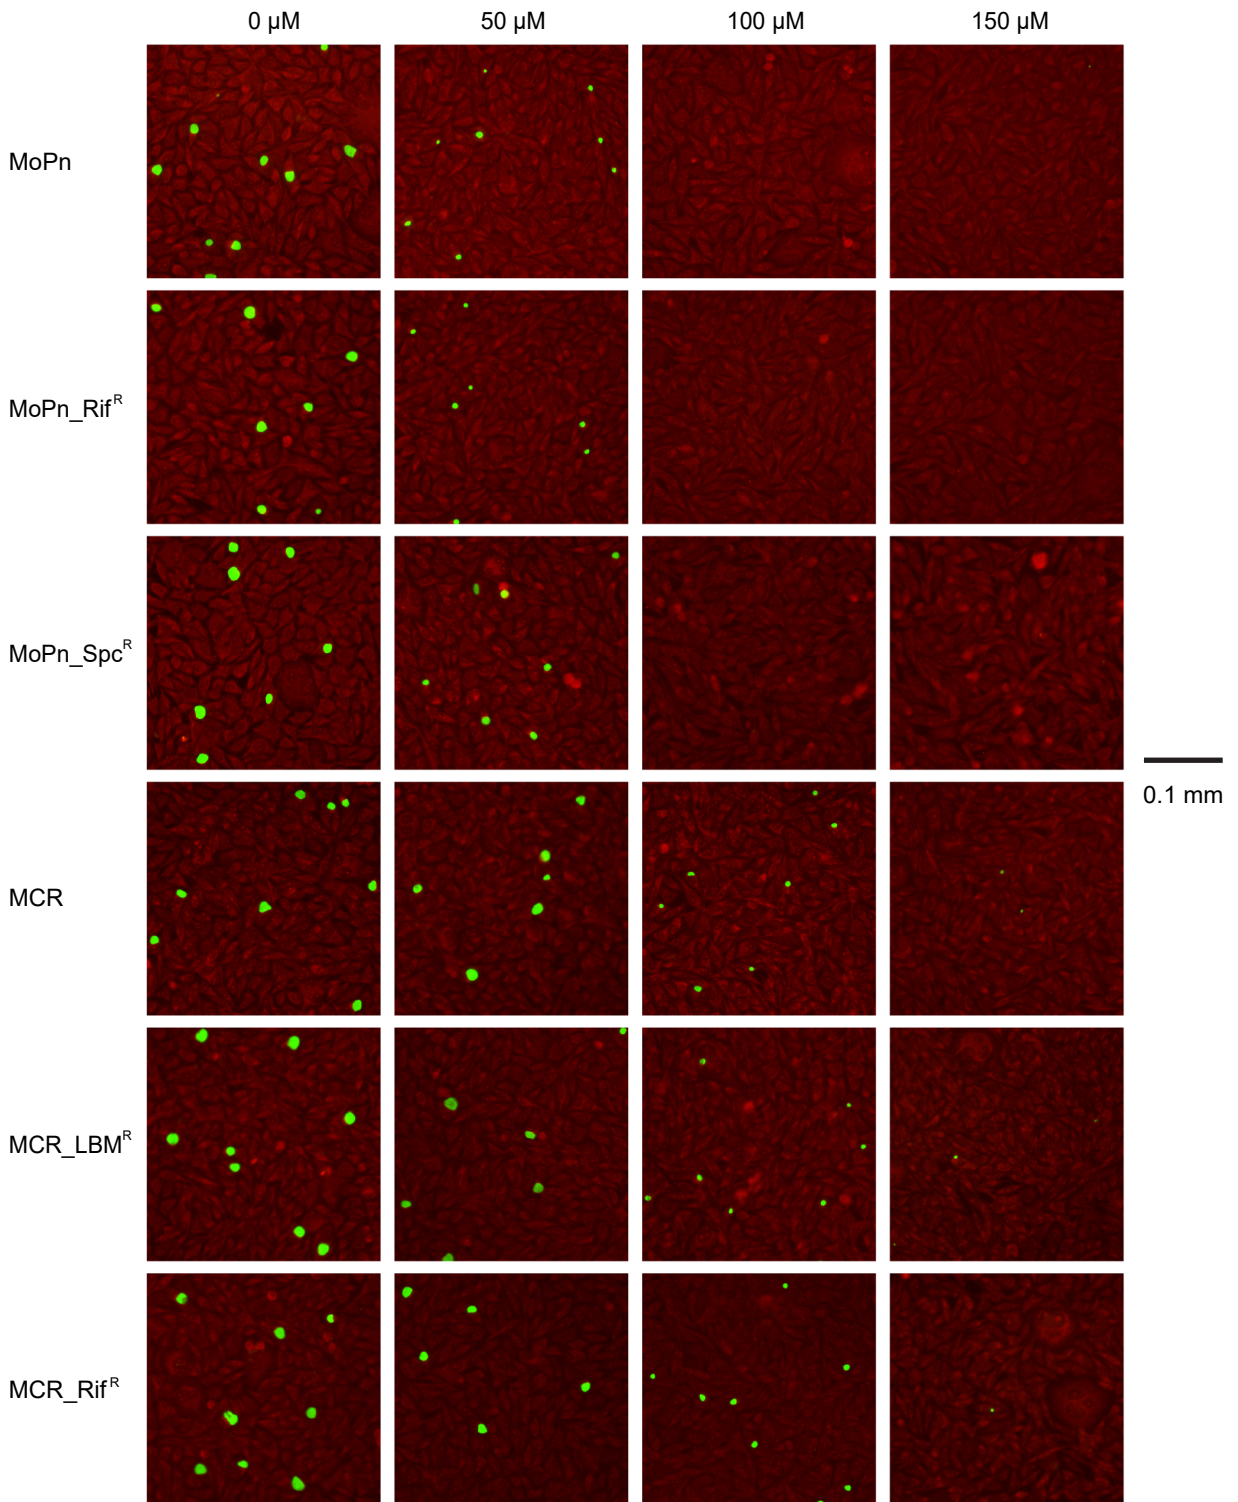

**S1 Figure. Rifampin-, spectinomycin- and LBM415-resistance caused by mutations in *rpoB*, 16S rRNA and *defA*, respectively, in either MoPn or MCR do not change CF0001 inhibition efficiency.**

Chlamydiae grown without or with indicated concentrations of CF0001 were stained green using an anti-chlamydial LPS antibody 24 h post-inoculation. Host cells (red) were counter-stained with Evan blue.
